# Supplementary material
Source: HighWire-hosted journal article supplement (https://bmjopenquality.bmj.com/content/6/2/e000147)

**Appendix 1. Hospital surgical pathway with the items inserted in the check list used during the real-time observations in the operating room [modified by de Vries et al.23]**


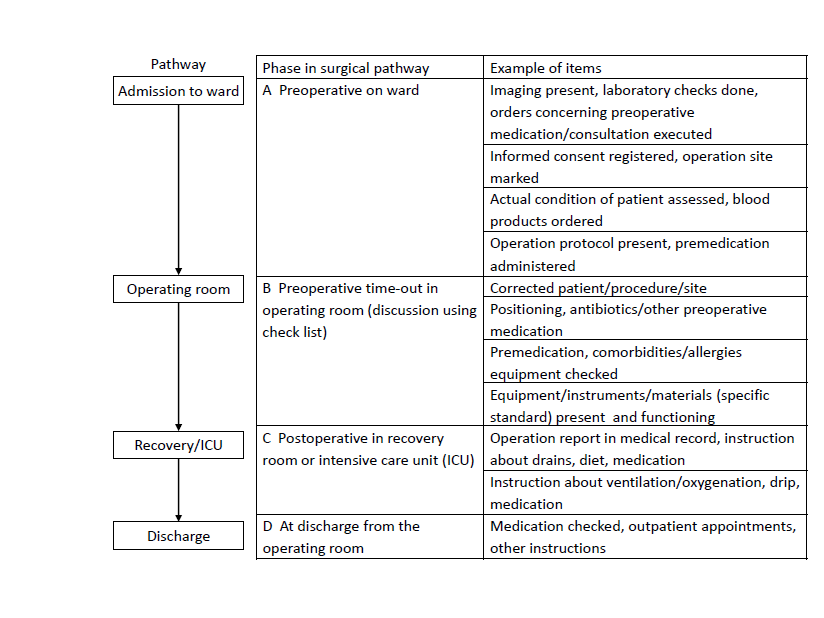

Supplement: inline-supplementary-material-1 [file inline-supplementary-material-1.docx]
